# Supplementary material for: Sizes of Long RNA Molecules Are Determined by the Branching Patterns of Their Secondary Structures
Source: PubMed Central journal article supplement (PMC5113152; doi:10.1016/j.bpj.2016.10.014), 2016-11-15
Supplement: mmc1.pdf [file mmc1.pdf]

**Biophysical Journal, Volume 111**

**Supplemental Information**

**Sizes of Long RNA Molecules Are Determined by the Branching Patterns of Their Secondary Structures**

**Alexander Borodavka, Surendra W. Singaram, Peter G. Stockley, William M. Gelbart, Avinoam Ben-Shaul, and Roman Tuma**

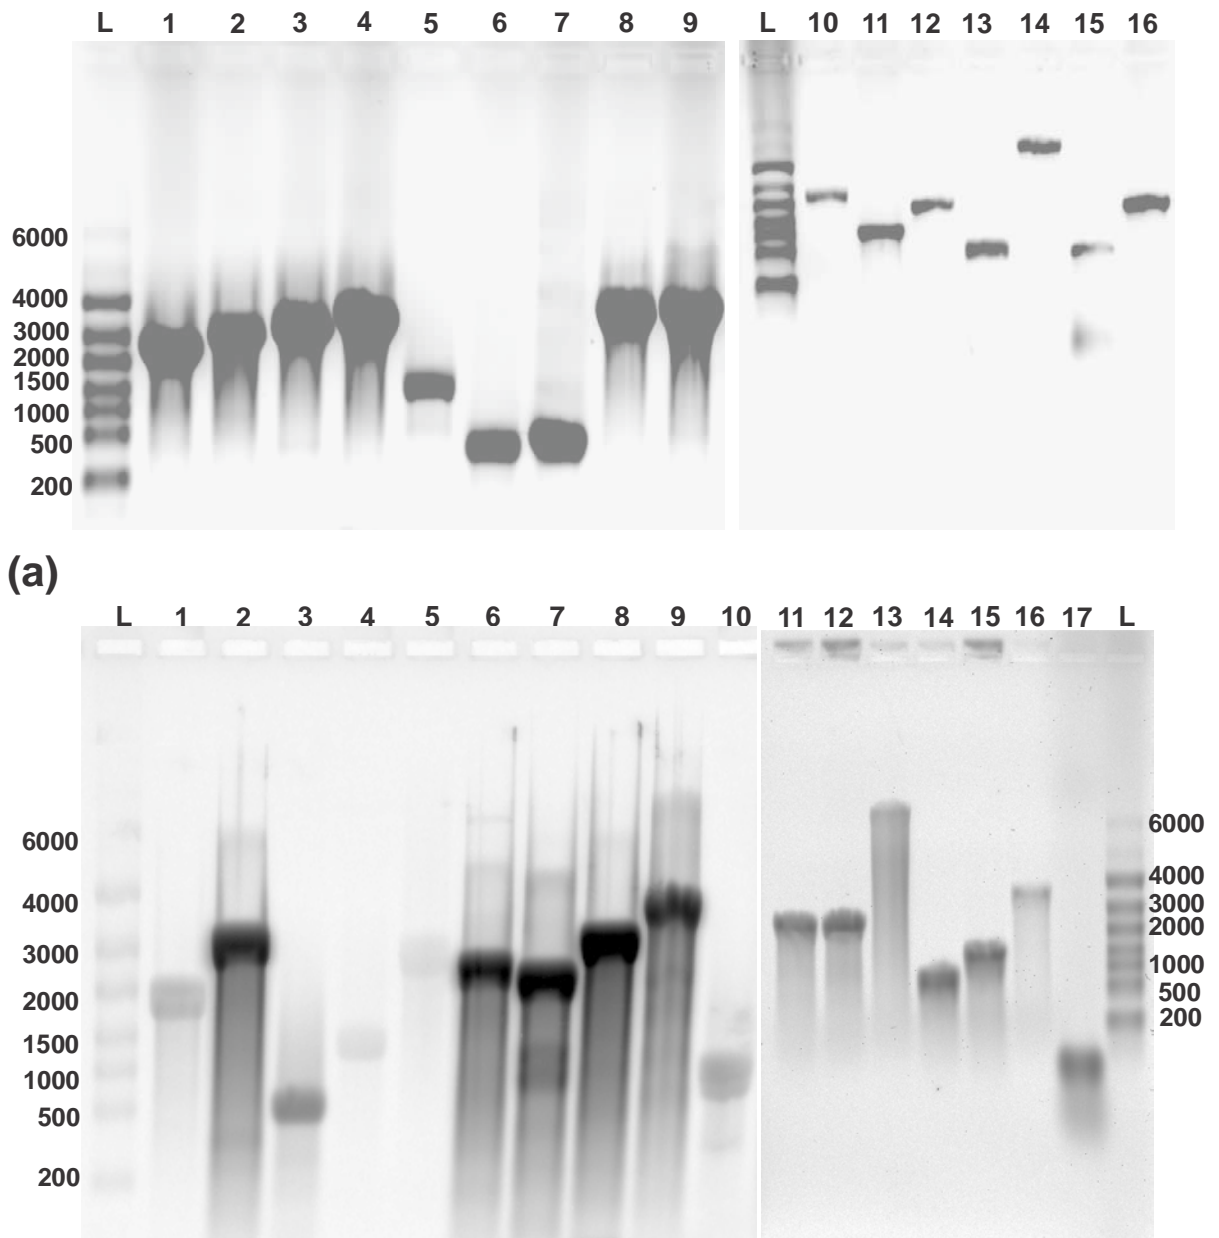

**(b)**

Figure S1. Denaturing formaldehyde agarose gel electrophoresis of ssRNA transcripts. (a) In vitro transcribed RNAs were separated on a formaldehyde agarose gel (1% w/v), as described below, and visualised by staining with ethidium bromide. Lane 1 – NRON; lane 2 – MS2; lane 3 – rpoB; lane 4 – MS2; lane 5 – Ef2Xlaevis; lane 6 – s11 RV; lane 7 – s11 RV after GMP-primed transcription; lane 8 – s1 RV; lane 9 – TCV; lane 10 – FHV1; lane 11 – FHV2; lane 12 – 5'RNA; lane 13 – BunV-S; lane 14 – BunV-L; lane 15 – iRNA (a 930 nt transcribed subgenomic MS2 RNA); lane 16 – 3'RNA. (b) AF488 dye-labelled RNAs visualised by fluorescence scanning upon excitation with 492 nm laser. Lane 1 – Ef2Xlaevis; lane 2 – s1 RV; lane 3 – s11 RV; lane 4 – STNV; lane 5 – 23S rRNA; lane 6 – NRON; lane 7 – HOTAIR; lane 8 – MS2; lane 9 – TCV; lane 10 – BunV-S; lane 11 – 3'RNA; lane 12 – 5'RNA; lane 13 – BunV-L, lane 14 – BunV-S; lane 15 – FHV2; lane 16 – FHV1; lane 17 – 120-mer RNA. L – RNA ladder (Thermo Scientific, #SM1821), sizes shown in number of nucleotides.

**Table S1: Oligonucleotide primers used for PCR cloning**

T7 promoter sequences are underlined and the first nucleotide (**G**) incorporated into RNA transcript is shown in bold. The restriction sites utilised for linearising DNA templates are *italicised*.

| <b>Name of the construct</b>     | <b>Primer name</b> | <b>Primer sequence and restriction enzyme site used</b>        |
|----------------------------------|--------------------|----------------------------------------------------------------|
| TCV_pSMART HC <sup>Amp</sup>     | TCV_F1             | GTAATCTGCAAATCCCTGCACCCGCCTAAA                                 |
|                                  | TCV_R1             | GGGCAGGCCCCCCCCCGC                                             |
|                                  | TCV_F2             | <u>TAATACGACTCACTATAG</u> GGGAGAGTAATCTGCAAATCCCTGCACCCGCCTAAA |
|                                  | TCV_R2             | <i><b>CTCGAGGGGCAGGCCCCCCCCCGCG (XhoI)</b></i>                 |
| 16SrRNA_pSMART HC <sup>Amp</sup> | 16S_F1             | TAAGGAGGTGATCCAACCGC                                           |
|                                  | 16S_R1             | AAATTGAAGAGTTTGATCATGGCTC                                      |
|                                  | 16S_F2             | <u>TAATACGACTCACTATAG</u> GGAAATTGAAGAGTTTGATCATGG             |
|                                  | 16S_R2             | <i><b>TTTAAATAAGGAGGTGATCCAACCGC (DraI)</b></i>                |
| 23SrRNA_pSMART HC <sup>Amp</sup> | 23S_F1             | GGTTAAGCGACTAAGCGTAC                                           |
|                                  | 23S_R1             | AAGGTTAAGCCTCACGGTTC                                           |
|                                  | 23S_F2             | <u>TAATACGACTCACTATAG</u> GGGGTTAAGCGACTAAGCGTAC               |
|                                  | 23S_R2             | <i><b>AAGCTTAAGGTTAAGCCTCACGGTTC (HindIII)</b></i>             |
| NRON_pJET1.2 <sup>Amp</sup>      | NRON_F             | CACATCTCTAATGTAAACAA                                           |
|                                  | NRON_R             | <i><b>GATATCTAATTACTGTTAATATCTTT (EcoRV)</b></i>               |
| HOTAIR_pSMART <sup>Amp</sup>     | HotAir_F1          | CCTCCAGGCCCTGCCTTCTG                                           |
|                                  | HotAir_R1          | TTTATATTCACCACATGTAA                                           |
|                                  | HotAir_F2          | <u>TAATACGACTCACTATAG</u> GGGACTCGCCTGTGCTCTGGAG               |
|                                  | HotAir_R2          | <i><b>GATATCTTTTTTTTTTGGAAAATGCAT (EcoRV)</b></i>              |

**Table S2: DNA constructs used for RNA in vitro transcription**

| Name of DNA construct                 | Promoter | Restriction enzyme for linearization | Plasmid size, kb |
|---------------------------------------|----------|--------------------------------------|------------------|
| RpoB_pSMART HC <sup>Amp</sup>         | T7       | <i>DraI</i>                          | 5.4              |
| MS2_pSMART HC <sup>Amp</sup>          | T7       | <i>HpaI</i>                          | 5.5              |
| TCV_pSMART HC <sup>Amp</sup>          | T7       | <i>XhoI</i>                          | 6.3              |
| 16SrRNA_pSMART HC <sup>Amp</sup>      | T7       | <i>DraI</i>                          | 3.3              |
| 23SrRNA_pSMART HC <sup>Amp</sup>      | T7       | <i>HindIII</i>                       | 4.7              |
| NRON_pJET1.2 <sup>Amp</sup>           | T7       | <i>EcoRV</i>                         | 5.6              |
| HOTAIR_pSMART <sup>Amp</sup>          | T7       | <i>EcoRV</i>                         | 4.1              |
| HCV JFH1/Luc SGR <sup>Amp</sup>       | T7       | <i>XbaI</i>                          | 11               |
| pUC19T7RFs1 <sup>Amp</sup>            | T7       | <i>BsmBI</i>                         | 6.3              |
| pUC19T7RFs11 <sup>Amp</sup>           | T7       | <i>BsmBI</i>                         | 3.6              |
| pF2100 (FHV1) <sup>Amp</sup>          | T7       | <i>XbaI</i>                          | 6.2              |
| P2BS WT (FHV2) <sup>Amp</sup>         | T3       | <i>XbaI</i>                          | 4.4              |
| pT7riboBUN-S <sup>Amp</sup>           | T7       | <i>BamHI</i>                         | 4                |
| BUNVL <sup>Amp</sup>                  | T7       | <i>BstUI</i>                         | 10               |
| pSMART2676 (3' MS2) HC <sup>Amp</sup> | T7       | <i>HindIII</i>                       | 4.4              |
| pSMART2578 (5' MS2) HC <sup>Amp</sup> | T7       | <i>HindIII</i>                       | 4.3              |
| pUBS-STNV-C <sup>Amp</sup>            | T7       | <i>XhoI</i>                          | 3.9              |
| pTri-Xef1 (TRIPLEScript)              | T7       | <i>XbaI</i>                          | N/A              |

**RNA nucleotide sequence information**

| RNA              | Length, nt | Fraction of nucleotides |      |      |      |
|------------------|------------|-------------------------|------|------|------|
|                  |            | A                       | C    | G    | U    |
| MS2              | 3569       | 0,23                    | 0,26 | 0,26 | 0,25 |
| 3' - MS2         | 2577       | 0,24                    | 0,26 | 0,26 | 0,24 |
| 5' - MS2         | 2468       | 0,24                    | 0,26 | 0,25 | 0,25 |
| 16S rRNA         | 1542       | 0,25                    | 0,23 | 0,32 | 0,2  |
| 23S rRNA         | 2903       | 0,26                    | 0,22 | 0,32 | 0,2  |
| BunVL            | 6875       | 0,37                    | 0,15 | 0,18 | 0,3  |
| BunVS            | 961        | 0,31                    | 0,19 | 0,22 | 0,27 |
| FHV1             | 3107       | 0,28                    | 0,24 | 0,24 | 0,23 |
| FHV2             | 1400       | 0,26                    | 0,26 | 0,23 | 0,25 |
| HCV              | 8891       | 0,23                    | 0,28 | 0,27 | 0,22 |
| HOTAIR           | 2258       | 0,29                    | 0,23 | 0,26 | 0,22 |
| NRON             | 2730       | 0,3                     | 0,24 | 0,22 | 0,24 |
| rpoB             | 3555       | 0,25                    | 0,26 | 0,27 | 0,22 |
| RV s11           | 667        | 0,34                    | 0,2  | 0,2  | 0,27 |
| RV s11 scrambled | 667        | 0,29                    | 0,23 | 0,27 | 0,2  |
| STNV             | 1221       | 0,29                    | 0,2  | 0,23 | 0,28 |
| TCV              | 4050       | 0,27                    | 0,24 | 0,27 | 0,22 |
| Ef2              | 1730       | 0,29                    | 0,22 | 0,24 | 0,25 |
| RV s1            | 3302       | 0,37                    | 0,16 | 0,19 | 0,28 |

## RNA sequences:

### >Scrambled RNA

GCCUUUUGCAGCGCUCGCGGUGACCUCCGCGCAAGCGAGGUUUGGAGUCAUGCGUCUCUGUCGUCGACUUAUUAACAA  
 GAGUGGAUCAUCUGCGGCCACGUCAACCCGGCUACGAUUCACUCAGGCCUAGAGGGGAUCAUAGCUCUGAGUCGAUAC  
 AGCACAAUCCUGAAUGCAAACCGUACAAGUCUCGCGGAGAAAUGAGACCAGCAGAUUGUACUUGCAACGAAUCACGG  
 ACCAUCUAUACGGAGAGAUUCGAAAGGCGUUCAGCCUACUACCUACCAUCGCCUGUUAUUCGACUCUUAACGAUCAAAAG  
 GGUCAUCGGUGAACGUACGGACCUAUUUGGCGGGUUUGUCCUUCGAAAGGAAGUAGUACGAAAGCGAACCUAGGUU  
 CAUGUAUACCCCUAUCAGGCAGUUCGAGUAGAGGAAAGGCCUAGGGCGACGAUAAAUCAAGGGGACUCUAGCCGGAAG  
 AGGAAGUGGCAUCGGAUGAAGUGGACAAGACGCUCGAGGGUGUCGAGAGUGGUGAUGAUUAACGUAAAUAUUGUAAAAG  
 AUAUAUCGAAGCCUUCGAAAAAAGAACCGAAUUGAAACAGUGUGCAAGACAAGGGGAUCGAAGAUUUGGGUCCCAAACC  
 UAUGAGGGCACUCGAGAGCCCGACACUCCCUUAGUGAGACG

| RNA sequence        | Genbank Accession                      | Reference                                                  |
|---------------------|----------------------------------------|------------------------------------------------------------|
| 16S rRNA            | AM946981.2 (region 2596124 to 2597665) |                                                            |
| HCV replicon        | AB114136.1                             | Targett-Adams et al. (2005) J.Gen Virol., 86:3075-80.      |
| RpoB                | AM946981.2 (region 4089308 to 4092862) | Borodavka et al. (2012) PNAS, 109: 39, 15769-15774.        |
| 23S rRNA            | AM946981.2 (region 3285031 to 3287938) |                                                            |
| FHV1                | X77156.1                               |                                                            |
| NRON                | NR_045006.1                            |                                                            |
| MS2                 | V00642.1                               | Borodavka et al. (2012) PNAS, 109: 39, 15769-15774.        |
| STNV                | AJ000898.1                             | Bringloe et al. (1998) J Gen Virol. 79:1539-46.            |
| TCV                 | M22445.3                               | Thomas et al. (2003) Virology, 306, 33-41                  |
| EF-Tu X.laevis mRNA | X55324.1                               |                                                            |
| BUNV-L              | X14383                                 | Elliot RM (1989) J. Gen. Virol, 70, 1281-1285              |
| BUNVS               | D00353.1                               | Elliot RM (1989) J. Gen. Virol, 70, 1281-1285              |
| FHV2                | X15959.1                               | Disgupta, R (1989) Nucleic Acids Res., 17 (18), 7525-7526  |
| HOTAIR              | DQ926657.1                             | Rinn, JL (2007) Cell 129 (7), 1311-1323                    |
| RV S1               | KF729638.1                             | Richards, J.E., (2013) PLoS ONE 8 (9), E74328              |
| RV S11              | KF729678                               | Richards, J.E., (2013) PLoS ONE 8 (9), E74328              |
| 3' MS2 RNA          | GQ456167.1                             | Rolfsson et al., J Mol Biol. 2010 Aug 13; 401(2): 309-322. |
| 5' MS2 RNA          | GQ456168.1                             | Rolfsson et al., J Mol Biol. 2010 Aug 13; 401(2): 309-322. |
